# Supplementary material for: Fishers’ Perception on the Interaction between Dolphins and Fishing Activities in Italian and Croatian Waters
Source: MDPI journal article supplement (doi:10.3390/d15020133), 2023-01-18
Supplement: s1 [file s1]

Archive with 1 entries (1 files):
- diversity-2139455-supplementary.pdf
